# Supplementary material for: Development of a CH2-dependent analytical method using near-infrared spectroscopy via the integration of two algorithms: non-dominated sorting genetic-II and competitive adaptive reweighted sampling (NSGAII-CARS)
Source: Royal Society of Chemistry journal article supplement (doi:10.1039/d2ay02072f), 2023-01-01
Supplement: d2ay02072f1.pdf [file d2ay02072f1.pdf]

Table S1. Effect of spectral pretreatments and latent variables on the PLS models of GABA and L-Glu on under 10 equidistant intervals.

| Spectral pretreatments | LVs       | GABA (g/L)  |             |             |              | LV<br>s  | L-Glu (g/L) |             |             |              |
|------------------------|-----------|-------------|-------------|-------------|--------------|----------|-------------|-------------|-------------|--------------|
|                        |           | RMSEC       | RMSECV      | RMSEP       | Mean         |          | RMSEC       | RMSECV      | RMSEP       | Mean         |
| Smoothing              | 11        | 0.63        | 1.17        | 5.30        | 79.49        | 10       | 0.48        | 0.77        | 8.25        | 19.00        |
| Auto                   | 11        | 0.66        | 1.22        | 95.43       | 79.49        | 11       | 0.39        | 0.77        | 25.82       | 19.00        |
| <b>Detrend</b>         | <b>13</b> | <b>0.48</b> | <b>1.15</b> | <b>4.07</b> | <b>79.49</b> | <b>8</b> | <b>0.68</b> | <b>0.81</b> | <b>2.12</b> | <b>19.00</b> |
| SNV                    | 11        | 1.74        | 3.19        | 24.70       | 79.49        | 11       | 0.51        | 0.91        | 10.95       | 19.00        |
| Detrend + SNV          | 12        | 1.98        | 3.47        | 25.21       | 79.49        | 11       | 0.71        | 1.08        | 9.44        | 19.00        |
| SNV + Detrend          | 12        | 1.65        | 2.78        | 23.11       | 79.49        | 13       | 0.47        | 0.98        | 5.44        | 19.00        |
| MSC                    | 14        | 0.88        | 2.94        | 17.49       | 79.49        | 11       | 0.58        | 1.05        | 11.07       | 19.00        |
| Der1                   | 7         | 0.47        | 1.09        | 7.97        | 79.49        | 6        | 0.43        | 0.78        | 5.23        | 19.00        |
| Der2                   | 8         | 0.29        | 1.19        | 5.66        | 79.49        | 5        | 0.59        | 0.84        | 5.63        | 19.00        |
| Der1 + Detrend         | 9         | 0.45        | 1.13        | 4.60        | 79.49        | 7        | 0.56        | 0.80        | 2.60        | 19.00        |
| Der1 + SNV             | 8         | 1.11        | 4.33        | 22.46       | 79.49        | 15       | 0.01        | 1.54        | 7.86        | 19.00        |
| Der1 + MSC             | 8         | 1.86        | 4.77        | 16.70       | 79.49        | 8        | 0.42        | 1.69        | 5.88        | 19.00        |

Table S2. Effect of spectral pretreatments and latent variables on the PLS models of GABA and L-Glu on under 20 equidistant intervals.

| Spectral pretreatments | LVs       | GABA (g/L)  |             |             |              | LV<br>s   | L-Glu (g/L) |             |             |              |
|------------------------|-----------|-------------|-------------|-------------|--------------|-----------|-------------|-------------|-------------|--------------|
|                        |           | RMSEC       | RMSECV      | RMSEP       | Mean         |           | RMSEC       | RMSECV      | RMSEP       | Mean         |
| Smoothing              | 12        | 0.60        | 1.11        | 6.93        | 79.49        | 7         | 0.65        | 0.73        | 1.63        | 19.00        |
| Auto                   | 10        | 0.69        | 1.15        | 56.83       | 79.49        | 11        | 0.36        | 0.70        | 27.95       | 19.00        |
| <b>Detrend</b>         | <b>15</b> | <b>0.10</b> | <b>0.95</b> | <b>5.20</b> | <b>79.49</b> | <b>10</b> | <b>0.54</b> | <b>0.75</b> | <b>1.95</b> | <b>19.00</b> |
| SNV                    | 12        | 0.96        | 2.70        | 9.58        | 79.49        | 13        | 0.54        | 0.90        | 9.19        | 19.00        |
| Detrend + SNV          | 12        | 1.40        | 3.25        | 24.22       | 79.49        | 14        | 0.34        | 1.01        | 4.08        | 19.00        |
| SNV + Detrend          | 12        | 1.65        | 2.78        | 23.11       | 79.49        | 13        | 0.45        | 0.91        | 9.58        | 19.00        |
| MSC                    | 14        | 0.71        | 2.47        | 4.83        | 79.49        | 13        | 0.46        | 0.97        | 8.53        | 19.00        |
| Der1                   | 7         | 0.51        | 1.08        | 7.76        | 79.49        | 6         | 0.41        | 0.76        | 5.34        | 19.00        |
| Der2                   | 6         | 0.63        | 1.20        | 7.24        | 79.49        | 3         | 0.61        | 0.76        | 2.65        | 19.00        |
| Der1 + Detrend         | 9         | 0.28        | 1.10        | 6.28        | 79.49        | 6         | 0.51        | 0.78        | 1.91        | 19.00        |
| Der1 + SNV             | 9         | 0.86        | 3.99        | 27.84       | 79.49        | 14        | 0.02        | 1.39        | 7.75        | 19.00        |
| Der1 + MSC             | 15        | 0.06        | 3.73        | 36.30       | 79.49        | 14        | 0.04        | 1.52        | 4.33        | 19.00        |

Table S3. Effect of spectral pretreatments and latent variables on the PLS models of GABA and L-Glu on under 30 equidistant intervals.

| Spectral pretreatments | LVs       | GABA (g/L)  |             |             |              | LV<br>s   | L-Glu (g/L) |             |             |              |
|------------------------|-----------|-------------|-------------|-------------|--------------|-----------|-------------|-------------|-------------|--------------|
|                        |           | RMSEC       | RMSECV      | RMSEP       | Mean         |           | RMSEC       | RMSECV      | RMSEP       | Mean         |
| Smoothing              | 13        | 0.30        | 0.97        | 6.83        | 79.49        | 13        | 0.16        | 0.66        | 3.54        | 19.00        |
| Auto                   | 14        | 0.25        | 1.00        | 44.27       | 79.49        | 14        | 0.13        | 0.62        | 31.94       | 19.00        |
| Detrend                | 15        | 0.18        | 1.01        | 9.29        | 79.49        | 11        | 0.38        | 0.73        | 4.77        | 19.00        |
| SNV                    | 14        | 0.81        | 2.29        | 23.23       | 79.49        | 13        | 0.39        | 0.86        | 2.09        | 19.00        |
| Detrend + SNV          | 12        | 1.57        | 2.91        | 16.89       | 79.49        | 14        | 0.34        | 0.82        | 2.79        | 19.00        |
| SNV + Detrend          | 14        | 1.04        | 2.46        | 12.83       | 79.49        | 13        | 0.30        | 0.78        | 5.06        | 19.00        |
| MSC                    | 9         | 2.22        | 2.66        | 10.25       | 79.49        | 13        | 0.44        | 0.90        | 2.33        | 19.00        |
| Der1                   | 15        | 0.02        | 0.91        | 10.75       | 79.49        | 12        | 0.04        | 0.62        | 2.97        | 19.00        |
| Der2                   | 15        | 0.07        | 1.08        | 10.74       | 79.49        | 15        | 0.01        | 0.62        | 4.28        | 19.00        |
| <b>Der1 + Detrend</b>  | <b>15</b> | <b>0.02</b> | <b>1.06</b> | <b>4.08</b> | <b>79.49</b> | <b>14</b> | <b>0.08</b> | <b>0.68</b> | <b>1.64</b> | <b>19.00</b> |
| Der1 + SNV             | 15        | 0.05        | 3.65        | 37.31       | 79.49        | 12        | 0.33        | 1.39        | 10.19       | 19.00        |
| Der1 + MSC             | 13        | 0.20        | 3.57        | 11.52       | 79.49        | 13        | 0.08        | 1.34        | 5.58        | 19.00        |

Table S4. Effect of spectral pretreatments and latent variables on the PLS models of GABA and L-Glu on under 40 equidistant intervals.

| Spectral pretreatments | LVs       | GABA (g/L)  |             |             |              | LV<br>s   | L-Glu (g/L) |             |             |              |
|------------------------|-----------|-------------|-------------|-------------|--------------|-----------|-------------|-------------|-------------|--------------|
|                        |           | RMSEC       | RMSECV      | RMSEP       | Mean         |           | RMSEC       | RMSECV      | RMSEP       | Mean         |
| Smoothing              | 14        | 0.25        | 0.93        | 6.71        | 79.49        | 12        | 0.31        | 0.64        | 7.24        | 19.00        |
| Auto                   | 9         | 0.90        | 1.11        | 84.00       | 79.49        | 11        | 0.34        | 0.67        | 12.25       | 19.00        |
| <b>Detrend</b>         | <b>15</b> | <b>0.14</b> | <b>0.81</b> | <b>4.20</b> | <b>79.49</b> | <b>14</b> | <b>0.07</b> | <b>0.64</b> | <b>3.29</b> | <b>19.00</b> |
| SNV                    | 13        | 0.77        | 2.16        | 29.84       | 79.49        | 13        | 0.51        | 0.83        | 7.78        | 19.00        |
| Detrend + SNV          | 13        | 1.09        | 2.94        | 19.69       | 79.49        | 14        | 0.32        | 0.86        | 2.54        | 19.00        |
| SNV + Detrend          | 14        | 0.77        | 2.39        | 16.78       | 79.49        | 15        | 0.21        | 0.69        | 2.17        | 19.00        |
| MSC                    | 12        | 1.81        | 2.61        | 26.19       | 79.49        | 13        | 0.58        | 0.99        | 9.81        | 19.00        |
| Der1                   | 15        | 0.02        | 0.80        | 7.82        | 79.49        | 15        | 0.05        | 0.57        | 3.43        | 19.00        |
| Der2                   | 15        | 0.02        | 0.90        | 7.49        | 79.49        | 13        | 0.06        | 0.56        | 3.52        | 19.00        |
| Der1 + Detrend         | 15        | 0.04        | 0.86        | 6.12        | 79.49        | 15        | 0.05        | 0.59        | 2.52        | 19.00        |
| Der1 + SNV             | 15        | 0.09        | 3.37        | 32.89       | 79.49        | 15        | 0.02        | 1.21        | 7.36        | 19.00        |
| Der1 + MSC             | 15        | 0.10        | 3.52        | 23.31       | 79.49        | 15        | 0.04        | 1.31        | 3.62        | 19.00        |

Table S5. Effect of spectral pretreatments and latent variables on the PLS models of GABA and L-Glu on under 50 equidistant intervals.

| Spectral pretreatments | LVs       | GABA (g/L)  |             |             |              | LV<br>s   | L-Glu (g/L) |             |             |              |
|------------------------|-----------|-------------|-------------|-------------|--------------|-----------|-------------|-------------|-------------|--------------|
|                        |           | RMSEC       | RMSECV      | RMSEP       | Mean         |           | RMSEC       | RMSECV      | RMSEP       | Mean         |
| Smoothing              | 14        | 0.29        | 0.89        | 8.24        | 79.49        | 13        | 0.34        | 0.61        | 1.27        | 19.00        |
| Auto                   | 15        | 0.12        | 0.79        | 186.21      | 79.49        | 14        | 0.11        | 0.54        | 103.81      | 19.00        |
| <b>Detrend</b>         | <b>15</b> | <b>0.11</b> | <b>0.85</b> | <b>5.66</b> | <b>79.49</b> | <b>11</b> | <b>0.35</b> | <b>0.62</b> | <b>1.52</b> | <b>19.00</b> |
| SNV                    | 14        | 0.62        | 1.93        | 19.82       | 79.49        | 14        | 0.42        | 0.82        | 3.44        | 19.00        |
| Detrend + SNV          | 9         | 2.35        | 3.17        | 9.31        | 79.49        | 12        | 0.64        | 1.03        | 5.07        | 19.00        |
| SNV + Detrend          | 9         | 2.13        | 2.78        | 6.80        | 79.49        | 15        | 0.44        | 0.91        | 4.27        | 19.00        |
| MSC                    | 14        | 0.83        | 2.03        | 17.71       | 79.49        | 13        | 0.55        | 0.85        | 2.54        | 19.00        |
| Der1                   | 15        | 0.06        | 0.82        | 7.87        | 79.49        | 15        | 0.01        | 0.59        | 2.88        | 19.00        |
| Der2                   | 11        | 0.10        | 0.96        | 6.60        | 79.49        | 15        | 0.01        | 0.55        | 3.87        | 19.00        |
| Der1 + Detrend         | 15        | 0.03        | 0.85        | 9.46        | 79.49        | 14        | 0.02        | 0.64        | 3.46        | 19.00        |
| Der1 + SNV             | 15        | 0.10        | 3.16        | 33.54       | 79.49        | 14        | 0.05        | 1.21        | 8.47        | 19.00        |
| Der1 + MSC             | 15        | 0.22        | 3.02        | 11.04       | 79.49        | 15        | 0.14        | 1.22        | 2.43        | 19.00        |
